# Supplementary material
Source: Springer Nature journal article supplement (https://www.springermedizin.de/resource/supplementary/12992_2012_155_MOESM3_ESM.pdf/9616578)
Supplement: MOESM3 [file 9616578]

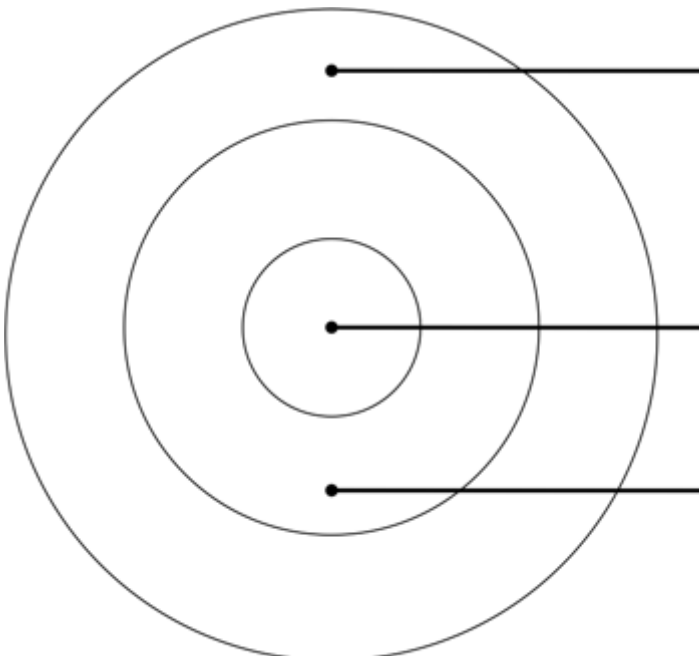

### **Connections**

- Relationships with community
- Strengthened relationships within the team
- Open and respectful dialogue
- Development of trust and mutual understanding
- Increased credibility as an individual, organization and country
- A forum to discuss and solve common problems
- Understanding the needs of different populations

### **Learning**

- Access to information beneficial to performing one's job
- Greater awareness of factors impacting health
- Better understanding of global health challenges
- Access to skills and knowledge not available otherwise
- Professional and personal development

### **Actions**

- Capacity to respond to new and emerging issues
- Improved organizational innovation and management
- Improved disease management
- Improved financial management
- Improved human resource development
- Improved human resource management
- Improved patient-provider relationships
- Efficient and effective health care practices
- Ability to achieve organizational objectives
- Creative innovation and product development
- Ability to integrate health systems structures
- Improved resource and waste management
- Ability to do one's job better
